# Supplementary material for: Impaired Bile Acid Metabolism and Gut Dysbiosis in Mice Lacking Lysosomal Acid Lipase
Source: MDPI journal article supplement (doi:10.3390/cells10102619), 2021-10-01
Supplement: s1 [file s1]

Supplementary Table S1: Primer sequences used for quantitative real time PCR analysis

| Gene name                                                                        | Primer sequences (5' to 3')                                      |
|----------------------------------------------------------------------------------|------------------------------------------------------------------|
| Fibroblast growth factor 15 ( <i>Fgf15</i> )                                     | F- GCC ATC AAG GAC GTC AGC A<br>R- CTT CCT CCG AGT AGC GAA TCA   |
| Cholesterol 7 alpha-hydroxylase ( <i>Cyp7a1</i> )                                | F- GGG CAT CTC AAG CAA ACA CCA<br>R- CGG GAC TGA TCT AGA GGG GGA |
| Fibroblast growth factor receptor 4 ( <i>Fgfr4</i> )                             | F- TTG ATG TCT GTT GTC TTC AGG<br>R- CCC ACA TAC AGT GGC TGA AAC |
| Sterol 12-alpha-hydroxylase ( <i>Cyp8b1</i> )                                    | F- AAG GCT GGC TTC CTG AGC TT<br>R- AAC AGC TCA TCG GCC TCA TC   |
| Bile salt export pump ( <i>Bsep/Abcb11</i> )                                     | F- CTG CCA AGG ATG CTA ATG CA<br>R- CGA TGG CTA CCC TTT GCT TCT  |
| Sodium/taurocholate co-transporter 3<br>( <i>Ntcp/Slc10a1</i> )                  | F- ATG ACC ACC TGC TCC AGC TT<br>R- GCC TTT GTA GGG CAC CTT GT   |
| Cytochrome P450, family 2, subfamily c, polypeptide<br>70 ( <i>Cyp2c70</i> )     | F- TGG CTT TCT CAG CAG GAA GAA<br>R- AAC TGG CTT GGT GTC GAT GT  |
| Cytochrome P450, family 27, subfamily a,<br>polypeptide 1 ( <i>Cyp27a1</i> )     | F- GCC TTG CAC AAG GAA GTG ACT<br>R- CGC AGG GTC TCC TTA ATC ACA |
| Beta-klotho ( $\beta$ - <i>Klotho</i> )                                          | F- ACG GCT GGT TCA CAG ATA GCT<br>R- CAT CAA ATT TTA TTG CTT GAA |
| Oxysterol 7-alpha-hydroxylase ( <i>Cyp7b1</i> )                                  | F- CTG CAG TCA ACA GGT CAA A<br>R- GCC TCA GAA CCT CAA GAA TAG   |
| Apical sodium-dependent bile acid transporter<br>( <i>Asbt/Slc10a2</i> ) (Ileal) | F- GTA CAA TGG TGG AGC ACA GC<br>R- GTG CCT GGA TCA TTG AAC CC   |
| Ileal fatty acid binding protein 6 ( <i>I-Babp/Fabp6</i> )<br>(Ileal)            | F- GGC AAA GAA TGT GAA ATG CAG<br>R- CCG AAG TCT GGT GAT AGT TGG |
| Organic solute transporter a/b ( <i>Osta/b</i> ) (Ileal)                         | F- AGT TTG CTC TGT TCC AGG TGC<br>R- TGT TAG CCA AGA TGG AGA AAA |

## Supplemental Figure S1

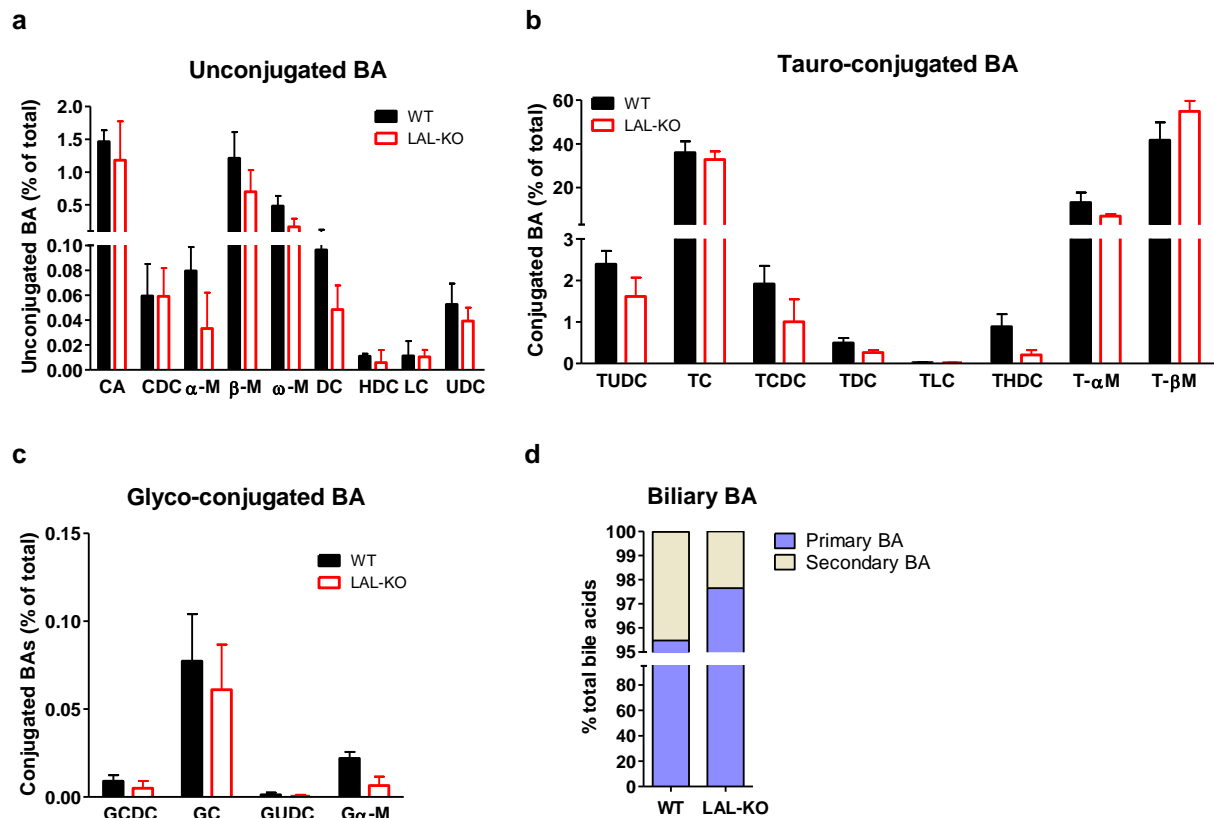

**Figure S1:** Biliary bile acid composition in WTD-fed LAL-KO mice: Biliary (a) unconjugated, (b) tauro-conjugated, and (c) glyco-conjugated bile acids. (d) Proportion of primary and secondary biliary bile acids of WTD-fed male mice (12-14 weeks of age). Primary bile acids include free and conjugated forms of CA, CDCA,  $\alpha$ -MCA, and  $\beta$ -MCA, whereas secondary bile acids include DCA, LCA,  $\omega$ -MCA, and UDCA.
